# Supplementary material for: The Genomic Landscape of Merkel Cell Carcinoma and Clinicogenomic Biomarkers of Response to Immune Checkpoint Inhibitor Therapy
Source: Oxford University Press journal article supplement (doi:10.1158/1078-0432.ccr-18-4159), 2019-08-09
Supplement: 10780432ccr184159-sup-214109_4_supp_5639556_pcg2mc.docx [file 10780432ccr184159-sup-214109_4_supp_5639556_pcg2mc.docx]

| NGS-viral status | TMB-class | Total | IHC-positive | IHC-negative |
| --- | --- | --- | --- | --- |
| Positive | All | 15 | 14 | 1 |
| High | 0 | 0 | 0 |
| Intermediate | 0 | 0 | 0 |
| Low | 15 | 14 | 1 |
| Negative | All | 21 | 3 | 18 |
| High | 14 | 0 | 14 |
| Intermediate | 2 | 0 | 2 |
| Low | 5 | 3 | 2 |

**Supplementary Table 2. Viral detection by NGS and IHC.**

Validation of NGS-based Merkel Cell Polyomavirus detection with IHC-based viral expression. This table reports the concordance between virus detection by NGS and virus detection by IHC for all 36 patients in which both were performed.
