# Supplementary material for: The Genomic Landscape of Merkel Cell Carcinoma and Clinicogenomic Biomarkers of Response to Immune Checkpoint Inhibitor Therapy
Source: Oxford University Press journal article supplement (doi:10.1158/1078-0432.ccr-18-4159), 2019-08-09
Supplement: 10780432ccr184159-sup-214109_4_supp_5639559_pgg2mg.docx [file 10780432ccr184159-sup-214109_4_supp_5639559_pgg2mg.docx]

**
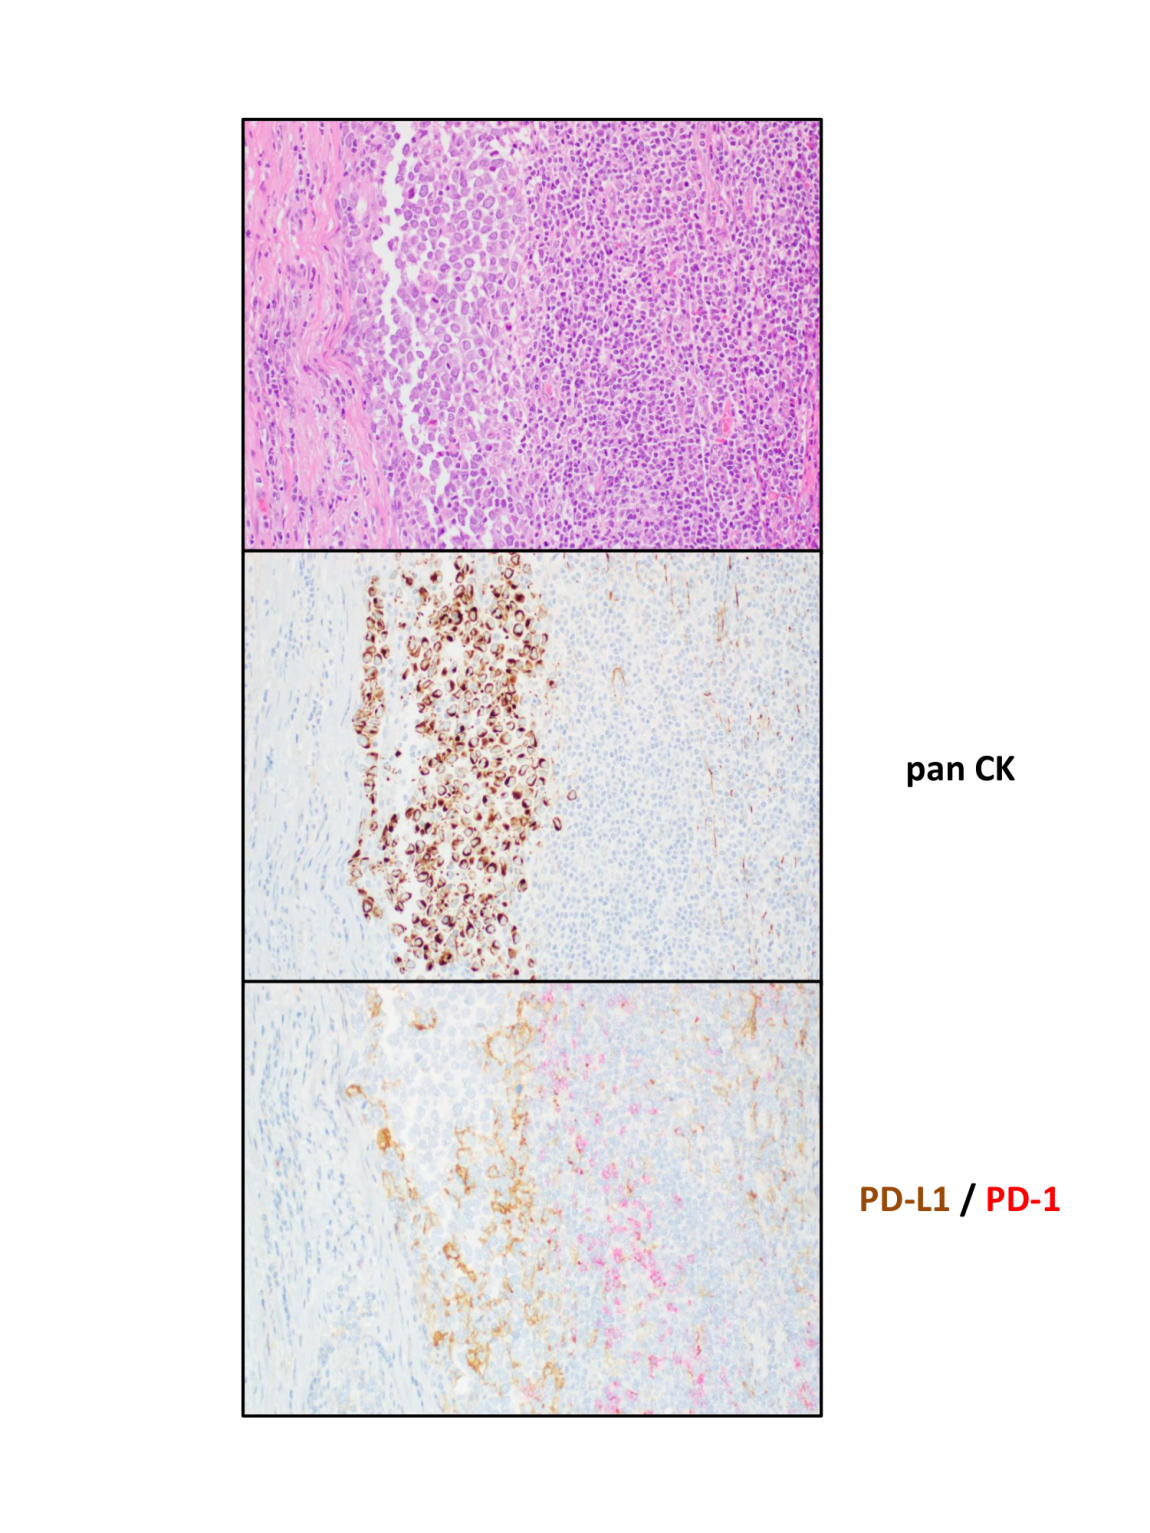
**

**Supplementary Figure 2. Representative images of dual immunohistochemistry for PD-1 and PD-L1.**

Standard light microscopic images are presented demonstrating the presence of Merkel cell carcinoma and the surrounding immune microenvironment (hematoxylin and eosin-stained, top panel). As expected, the MCC cells strongly express pan-cytokeratins with characteristic perinuclear dot-like expression (middle panel). Dual immunohistochemistry was performed for PD1 and PD-L1 (lower panel) demonstrating tumoral PD-L1 expression at the periphery and PD-1 expression by lymphocytes in close proximity, within 20 microns. This particular case was assessed as >5% PD-L1 positive and PD-1 positive.
