# Supplementary material for: The Genomic Landscape of Merkel Cell Carcinoma and Clinicogenomic Biomarkers of Response to Immune Checkpoint Inhibitor Therapy
Source: Oxford University Press journal article supplement (doi:10.1158/1078-0432.ccr-18-4159), 2019-08-09
Supplement: 10780432ccr184159-sup-214109_4_supp_5639561_pmg2mm.docx [file 10780432ccr184159-sup-214109_4_supp_5639561_pmg2mm.docx]

**
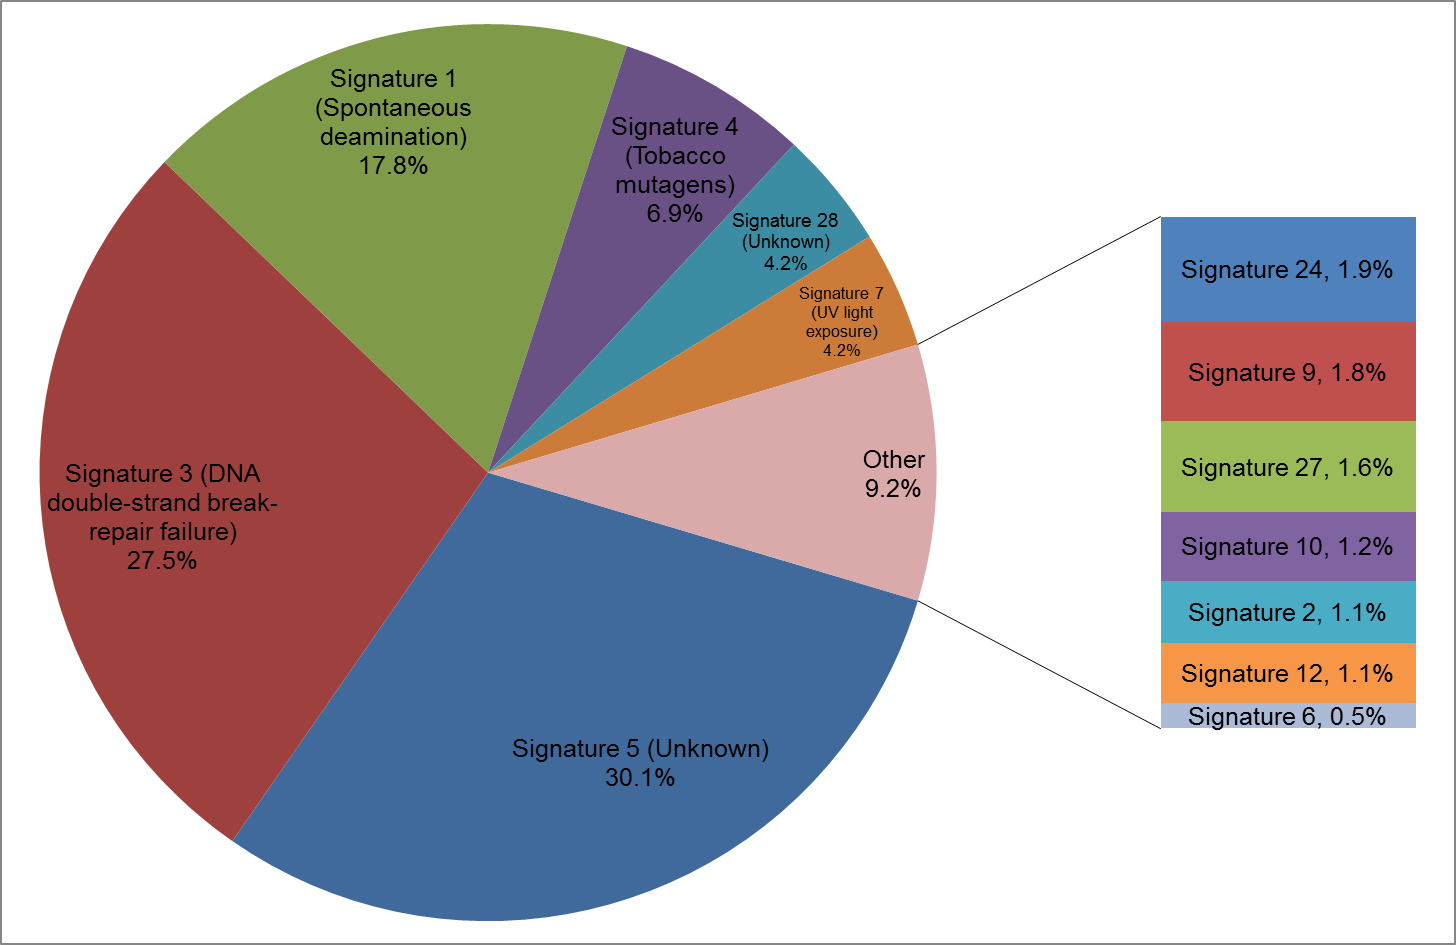
**

**Supplementary Figure 4. Percentage fit of** **collective mutations in the TMB-low group.**

All COSMIC defined signatures with greater than 4% fit are included in the main pie with the remaining signatures with >0% fit included in the second plot. Any signature not included here had a 0% fit.
